# A Public Database on Traumatic Brachial Plexus Injury

**Cristiane B Patroclo<sup>1,2,\*</sup>, Bia L Ramalho<sup>1,2</sup>, Juliana S Maia<sup>1,2</sup>, Maria Luíza Rangel<sup>1,2</sup>, Fernanda F Torres<sup>1,2</sup>, Lidiane Souza<sup>1,2</sup>, Kelly R Braghetto<sup>3</sup>, Claudia D Vargas<sup>1,2</sup>.**

<sup>1</sup>. Laboratory of Neurobiology of Movement, Institute of Biophysics Carlos Chagas Filho, Federal University of Rio de Janeiro, Rio de Janeiro, Brazil

<sup>2</sup>. Laboratory of Neuroscience and Rehabilitation, Institute of Neurology Deolindo Couto, Federal University of Rio de Janeiro, Rio de Janeiro, Brazil

<sup>3</sup>. Department of Computer Science, Institute of Mathematics and Statistics, University of São Paulo, São Paulo, Brazil

## \* Correspondence:

Cristiane B Patroclo  
crispatroclo@yahoo.com.br

**Keywords: public database, brachial plexus, traumatic injury, sharing data, traffic injury**

## Abstract

We hereby present the first worldwide public digital database centred on adult Traumatic Brachial Plexus Injury (TBPI). This initiative aims at reducing distance between clinical and experimental practice and encouraging data sharing and reuse. Detailed electronic questionnaires made with the free software LimeSurvey were designed to collect patients' epidemiological, physical and clinical data. The freely available software Neuroscience Experiments System (NES) was employed to support data storage and management. First results of this effort concern data collected from 109 Brazilian adult TBPI patients with varying degrees of functional impairment. The sample is composed by large majority of men (84.4%), mean age of 32.1 (11.3 SD) years old, victims of motorcycle accidents (67%). The similarity of this dataset basic descriptors with those from previous reports in TBPI validates the strategies employed herein. Managing data from diverse provenance in TBPI may allow identifying functional markers related to the patients' clinical improvement and foster the development of new investigative tools to unveil its mechanisms.

## 33 1 Introduction

34 Construction, maintenance and curation of public databases are becoming fundamental to  
35 propel our understanding of the nervous system function and dysfunction. This data-sharing  
36 paradigm emerged in the literature and media in the 90s<sup>(1,2)</sup> with the International Consortium for  
37 Brain Mapping, the first major data sharing initiative for fMRI measures. The growth of this trend  
38 had only been possible by the technological progress that substantially increased the capacity to  
39 generate data in neuroscience and the huge development of information technology<sup>(3,4)</sup>. In accordance  
40 to the data-sharing paradigm, we devised a public database able to store data of diverse provenance in  
41 the domain of traumatic brachial plexus injury (TBPI) and its surgical reconstruction in adult  
42 patients.

43 The brachial plexus is a nerve net that congregates the ventral divisions from C5 to T1 spinal  
44 nerves and is responsible for ipsilateral upper limb motricity and sensibility<sup>(5)</sup>. TBPI mainly affects  
45 young males usually involved in motorcycle accidents, often leading to severe motor and sensitive  
46 impairment in the affected upper limb<sup>(6)</sup>. Psychic, social and quality of life impairments are also  
47 reported<sup>(7,8)</sup>.

48 TBPI's treatment of choice is the surgical reconstruction allied with physical therapy<sup>(9,10)</sup>.  
49 Muscle strength is by far the focus of most frequent treatment outcomes<sup>(11,12)</sup>.

50 TBPI main associated prognostic factors are: patient's age, lesion site, severity and  
51 mechanisms, associated traumatic lesions, time interval between the injury occurrence and surgery  
52 and the employed surgical repair technique<sup>(13-23)</sup>. However, the lesion complexity, its heterogeneity,  
53 and the well documented brain plasticity that follows a peripheral nerve injury<sup>(24-26)</sup>, make it very  
54 difficult to preview patients' outcomes. This argues for the incorporation of other measures of  
55 success after TBPI<sup>(12)</sup> and for the development of specific instruments for the functional evaluation of  
56 these patients<sup>(27)</sup>.

57 In this context, for the first time a set of detailed questionnaires designed to collect TBPI  
58 patients' epidemiological, clinical, physical and surgical data together with the first set of  
59 anonymized results concerning 109 TBPI patients are made publicly available, as described here.

60

## 61 2 Methods

62 The development of the TBPI database was carried out by a multidisciplinary team  
63 comprising physicians, physiotherapists, neuroscientists and computer scientists.

64 Database building efforts involved the following steps: 2.1 patients selection, 2.2 data  
65 selection, 2.3 electronic questionnaires development, 2.4 data management platform development,  
66 2.5 data entering, 2.6 de-identification of personal data, 2.7 data access.

67

68

## 69 **2.1 Patient selection**

70 All the TBPI patients included in the database were older than 18 years and were evaluated at  
71 the Institute of Neurology Deolindo Couto of the Federal University of Rio de Janeiro (INDC-UFRJ)  
72 from 2010 to 2017 by physicians and physical therapists. Patients prospectively evaluated voluntarily  
73 gave their written consent allowing the publication of their de-identified data in a public database.  
74 Retrospective data, collected by the same group before the TBPI Database project, was also allowed  
75 to be included in the database by the local Ethics Committee.

76

## 77 **2.2 Data selection**

78 Epidemiological, clinical, physical and surgical data were collected through specifically  
79 designed questionnaires named: Unified Admission Assessment, Unified Follow up Assessment and  
80 Unified Surgical Evaluation.

81 Unified Admission Assessment (UAA) concerns information about TBPI (side, causes and  
82 associated lesions), ongoing treatments (physiotherapy, orthosis, medication), neurological exam  
83 with visual inspection (glenohumeral subluxation, scoliosis, Horner's syndrome, swelling, scars and  
84 trophic changes), presence of Tinel sign, sensory evaluation (light touch, pain, joint position sense,  
85 kinesthesia and pallesthesia), motor evaluation (motion range and muscle strength), pain occurrence  
86 and lesion site (preferably based on surgical information, followed by complementary exam, previous  
87 notes and physical exam). UAA was filled at the first interview and relied on medical records for  
88 missing data.

89 Unified Follow up Assessment (UFA) reviews ongoing treatments and neurological exam  
90 previously evaluated with UAA. It was filled at follow-up visits, ideally at each six months.

91 Unified Surgical Evaluation (USE) details surgical findings (level and type of lesion) and the  
92 employed procedures (type of surgery with its specificities). The USE questionnaire is filled by the  
93 neurosurgeons just after the surgery or by the researchers based on medical records.

94

## 95 **2.3 Electronic questionnaires development**

96 Electronic questionnaires present advantages when compared to paper-based ones such as  
97 ease and speed of administration, enforcement of data standardization (e.g., by using fixed choice  
98 response formats), immediate connection with the database, easier access to data and efficiency and  
99 security in data storage<sup>(28)</sup>. The questionnaires described in the previous section were created in an  
100 electronic format using the open-source survey system LimeSurvey. The decision for choosing  
101 LimeSurvey stemmed from the free availability of the tool and the fact that it relies on an underlying  
102 database management software, which can be deployed on a server that is deemed appropriate to  
103 store the target data and customized to support different data access policies. In addition, it supports  
104 several question types, enables the definition of restrictions on questions, admits design of logical  
105 branching based on answers and scores, allows the creation of multilingual surveys, enables the user  
106 to export collected data into spreadsheets, and supports general survey security settings.

107 The created electronic questionnaires follow the general structure of the paper-based  
108 questionnaires previously used by the group, facilitating adherence. The UAA, UFA and USE  
109 questionnaires favor multiple-choice questions to avoid excessive answers variability and enforce  
110 standardization in data entering. Besides, conditional branching arrangement of questions were  
111 employed to ensure data detailing.

112

## 113 **2.4 Data management platform development**

114 To meet the TBPI project's demands for data acquisition, management and sharing, a  
115 software tool named Neuroscience Experiment System (NES) was developed. NES is a free, safe,  
116 user-friendly platform originally devoted to assist researchers in their experimental data collecting  
117 routine and to enable experiments reproduction. The platform keeps comprehensive and detailed  
118 descriptions of experimental protocols in a unified repository, as well as data and metadata from  
119 different provenance, including epidemiological, clinical and physical database described in the  
120 present report. With this aim, NES was integrated with LimeSurvey to facilitate questionnaires'  
121 administration and to centralize data access.

122

## 123 **2.5 Data entering**

124 Prospective TBPI patients' data were collected through personal interview conducted by a  
125 neurologist and/or a physiotherapist. The collected data was directly registered in the database  
126 through the NES platform. Retrospective TBPI patients' data required careful selection, cleaning and  
127 transformation before entry the database. This process was done by the same neurologist and/or a  
128 physiotherapist who collected prospective data. Also, different sources were used in a hierarchical  
129 way to ensure data completeness and consistency: previous research records, medical records and  
130 patients' report via phone call.

131

## 132 **2.6 De-identification of personal data**

133 Patients' identification is only known by the local facility researchers. For the public version  
134 of the database the following information are suppressed: name; birthdate; ethnicity; address; phone  
135 number; professional information; dates (replaced by time intervals); injury circumstances as local of  
136 occurrence and details of hospitalization; and surgical and treatment places. Each patient in the  
137 database is identified by a noninformative code automatically generated by NES. These safety  
138 actions were inspired by the "Guidelines for working with small numbers"<sup>(29)</sup> from the Washington  
139 State Department of Health and by Hrynaszkiewicz (2010)<sup>(30)</sup>.

140

141

142

## 143 **2.7 Data access**

144 The anonymized version of the TBPI database (exported from NES) is available to public  
145 access in an Open Database portal [https://neuromatdb.numec.prp.usp.br/experiments/brachial-plexus-](https://neuromatdb.numec.prp.usp.br/experiments/brachial-plexus-injury-database-v2/)  
146 [injury-database-v2/](https://neuromatdb.numec.prp.usp.br/experiments/brachial-plexus-injury-database-v2/). Periodic database updates will be available in the portal with a brief description  
147 of the changes in the updated data as compared to the previous version.

148 The data are also hosted at figshare.

149 All public experimental data in the NeuroMat Open Database is available under the Creative  
150 Commons Attribution 4.0 International (CC BY 4.0) (<https://creativecommons.org/licenses/by/4.0/>)  
151 license. Therefore, to be able to download data, a potential user is required to agree and accept the  
152 CC BY 4.0 terms. According to CC BY 4.0, licensees may copy, distribute, and display the data and  
153 generate derivative works based on it only if they give the author(s) the appropriate credits  
154 (attribution).

155

## 156 **3 Code availability**

157 NES version 1.39 was used to create and manage the BPTI database. NES is a free software  
158 licensed under Mozilla Public License version 2.0. Its source code and documentation are available at  
159 <https://github.com/neuromat/nec>.

160 LimeSurvey version 2.05 was used to create and manage the electronic questionnaires. Its  
161 source code and documentation are available at <http://www.limesurvey.org/>. The structures of  
162 LimeSurvey questionnaires are stored in a .LSS file (which is basically an XML file) and can be  
163 imported in Limesurvey platform to (re)create a questionnaire.

164

## 165 **4 Data Records**

166 No specific software is required to handle the TBPI data from the NeuroMat Open Database.  
167 The dataset is downloaded as a single .ZIP file. It compresses several directories with plain-text files  
168 containing textual and numeric data (e.g., .CSV files for tabular data and .JSON files for metadata)  
169 that can be opened with a large variety of computational tools, from simple text editors to general-  
170 purpose statistical softwares.

171 In the root directory of the decompressed dataset, the data and metadata files are organized  
172 according the following hierarchical structure:

173 - Citation.txt

174 - Experiment.csv

175 - License.txt

176 + Group\_patients-with-brachial-plexus-injury (directory)

```
177     - Participants.csv
178   + Experimental_protocol (directory)
179     - Experimental_protocol_description.txt
180     - Experimental_protocol_image.png
181   + Step_1_questionnaire >> Additional_files (directory)
182     - unified-admission-assessment.lss
183     - unified-admission-assessment.pdf
184   + Step_2.1_questionnaire >> Additional_files (directory)
185     - unified-surgical-evaluation.lss
186     - unified-surgical-evaluation.pdf
187   + Step_2.2_questionnaire >> Additional_files (directory)
188     - unified-follow-up-assessment.lss
189     - unified-follow-up-assessment.pdf
190 + Questionnaire_metadata (directory)
191   + Q44071_unified-admission-assessment (directory)
192     - Fields_Q44071_en.csv
193     - Fields_Q44071_pt-BR.csv
194   + Q61802_unified-surgical-evaluation (directory)
195     - Fields_Q61802_en.csv
196     - Fields_Q61802_pt-BR.csv
197   + Q92510_unified-follow-up-assessment (directory)
198     - Fields_Q92510_en.csv
199     - Fields_Q92510_pt-BR.csv
200 + Per_questionnaire_data (directory)
201   + Q44071_unified-admission-assessment (directory)
202     - Responses_Q44071.csv
203   + Q61802_unified-surgical-evaluation (directory)
```

204           - Responses\_Q61802.csv  
205       + Q92510\_unified-follow-up-assessment (directory)  
206           - Responses\_Q92510.csv  
207   + Per\_participant\_data (directory)  
208       + Participant\_PXXXX (directory)  
209           + Step\_1\_questionnaire (directory)  
210               - Q44071\_unified-admission-assessment.csv  
211           + Step\_2.1\_questionnaire (directory)  
212               - Q61802\_unified-surgical-evaluation.csv  
213           + Step\_2.2\_questionnaire (directory)  
214               - Q92510\_unified-follow-up-assessment.csv  
215       + Participant\_PYYYY (directory)  
216       (...)  
217       (...)

218       *Citation.txt* and *License.txt* contain information about the license under which the dataset has  
219       been published and how it must be cited.

220       *Experiment.csv* is a CSV (*comma-separated values*) file with basic information (name,  
221       description, start and end date) about the experiment and study which have generated the dataset. In  
222       all the .CSV files of the dataset, values (fields) in each line are separated by commas (,), textual  
223       values are enclosed by quotation marks (“”), and the first file line contains the column titles (i.e., the  
224       descriptions of fields).

225       The directory *Group\_patients-with-brachial-plexus-injury* contains data and metadata related  
226       to the group of subjects called “Patients with brachial plexus injury” (which is the only group in the  
227       dataset) and its experimental protocol. The files *Participants.csv* contains personal, non-sensitive  
228       information about the subjects: participant code and gender. The *Experimental\_protocol* directory  
229       contains a text file and an image that summarizes the procedure used to gather the data (i.e., the  
230       sequence of administration of the questionnaires). In addition, *Experimental\_protocol* contains  
231       directories for each one of the three questionnaires used to collect the patient’s data (Step 1 - *Unified*  
232       *Admission Assessment*, Step 2.1 - *Unified Surgical Evaluation*, and Step 2.2 - *Unified Follow-up*  
233       *Assessment*). In each of these directories, the respective questionnaire can be found both in the .PDF  
234       and .LSS file formats. The .LSS file is from LimeSurvey; it can be used to recreate (import) the  
235       questionnaire structure in any LimeSurvey server.

236       In the *Questionnaire\_metadata* subdirectory, one may find .CSV files which describe the  
237       complete structure of the three questionnaires both in English and Brazilian Portuguese. Each .CSV

238 file contains, for each question in the questionnaire, its identifying code, description (complete text),  
239 type, sub-questions and answer options. To facilitate the understanding and manipulation of data  
240 collected using the questionnaires, we adopted a naming convention to question codes: the prefix of  
241 the code indicates the type of data collected by the question. For example, for the question "How old  
242 is the patient?", *intAge* should be used as code. The "int" prefix indicates that the value for age is an  
243 integer number. Table 1 shows the data types of the questions which appear in our questionnaires and  
244 their respective code prefixes.

245 The patients' data collected by means of the electronic questionnaires is replicated in two  
246 directories: *Per\_questionnaire\_data* and *Per\_participant\_data*. In the former, for each one of the  
247 three questionnaires, there is a directory containing a .CSV file (e.g., *Responses\_Q44071.csv*) with  
248 all the patient responses collected through the questionnaire. Each line in these CSV files contains a  
249 response for a particular patient; the identification of the patient appears in the column entitled  
250 "*participant\_code*". Each patient has exactly one response for the *Unified Admission Assessment*, but  
251 he/she can have none or more responses for the *Unified Surgical Evaluation* and *Unified Follow-up*  
252 *Assessment*. In other words, the participant code is unique in the *Responses\_Q44071.csv* file, but not  
253 in *Responses\_Q61802.csv* and *Responses\_Q92510.csv*. Different lines in the .CSV file with a same  
254 participant code indicate different responses of a same patient for a same questionnaire.

255 In the *Per\_participant\_data* directory, there is directory for each patient who participated in  
256 the study, containing a .CSV file for each questionnaire filled for him/her. If a patient has multiple  
257 responses for a given questionnaire, they will appear as different lines in its .CSV file. Each CSV file  
258 in the *Per\_participant\_data* directory contains responses of only one patient.

259 In the .CSV file containing responses for a given questionnaire, each column corresponds to a  
260 question or a sub-question of the questionnaire. All information required to understand the meaning  
261 of a column and its values can be recovered from the questionnaire's metadata file through the  
262 column name. Searching by a response column name in the "question\_index" column of the  
263 questionnaire's metadata file, one will find one or more lines which describe the correspondent  
264 question or subquestion and the type of responses it accepts.

265

## 266 5 Technical Validation

267 To our knowledge, this is the first public dataset concerning adult TBPI, thus precluding its  
268 comparison with other databases. Therefore, in this section we will limit our data validation to the  
269 basic epidemiological descriptors available in literature.

270 The present dataset contains data from 109 Brazilian adult patients with TBPI. In agreement  
271 with the classical report of Narakas<sup>(17)</sup>, and subsequent national<sup>(31-34)</sup> and international series<sup>(19,20,35)</sup>,  
272 our sample is composed mainly by young (average age at injury: 32.1 years  $\pm$  11.3SD) male (84.4 %)   
273 subjects involved in traffic accidents. Fifty-six patients (51%) have left side injury. Figure 1A depicts  
274 results of TBPI causes in 114 nerve injuries from 109 patients (one patient had bilateral injury and  
275 four patients had unilateral injury provoked by two different causes). The entire brachial plexus  
276 (encompassing C5 to T1 roots) is affected in 44% of the patients. Four patients present more than one  
277 site of lesion (Figure 1B).



278 The percentage of associated injuries (fractures and traumatic brain, spinal cord and vascular  
279 injuries) and reported pain in the 109 patients (Figure 1C) are also in accordance with the  
280 literature<sup>(14,31–33,36,37)</sup>.

281 The dataset also includes information of 81 UFA from 46 patients (42%) and 44 USE from 28  
282 patients. The average number of surgical reconstruction procedures per patient is  $1.8 \pm 0.6SD$ , with  
283 the nerve transfer (77%) as the most frequent.

284 Differing from published series, which limit their focus to specific aspects of TBPI, our  
285 database provides in the same set a wide range of information concerning this injury. This provides  
286 the opportunity of exploring the combination of these descriptors envisioning its deeper  
287 understanding.

288 In conclusion, this is the first report on a public database on TBPI. This is a unique initiative,  
289 resulting from a multidisciplinary effort, that stands out by its richness in clinical and  
290 epidemiological data and sharing potential. The similarity of this data with other national and  
291 international series endorses the quality of the present dataset. TBPI results mainly from traffic  
292 accidents, a huge public health problem especially in developing countries, and affects working age  
293 population with disabling consequences. In this sense, improving the knowledge on the TBPI can  
294 contribute to patient care, support governmental health strategies and give insights into factors related  
295 to its prognosis.

296

## 297 **6 Conflict of Interest**

298 *The authors declare that the research was conducted in the absence of any commercial or financial*  
299 *relationships that could be construed as a potential conflict of interest.*

300

## 301 **7 Author Contributions**

302 CBP: questionnaires' creation, questionnaires' translation, data collection, data analysis, writing,  
303 reviewing

304 BLR: questionnaires' creation, questionnaires' translation, data collection, data analysis, writing,  
305 reviewing

306 JM: questionnaires' creation, data collection, data analysis

307 MLR: questionnaires' creation, questionnaires' translation, data collection

308 FFT: questionnaires' translation, reviewing

309 LS: questionnaires' creation, data collection

310 KRB: intellectual conception, data analysis, writing, reviewing

311 CDV: intellectual conception, questionnaires' creation, data analysis, writing, reviewing

312

## 313 **9 Funding**

314 This work is part of the ABRACO Initiative for the *Brachial Plexus* Injury  
315 (<http://abraco.numec.prp.usp.br/>) of the Fundação de Amparo à Pesquisa do Estado de São  
316 Paulo (FAPESP)'s Research, Innovation and Dissemination Center for Neuromathematics (grant  
317 2013/07699-0, <http://neuromat.numec.prp.usp.br/>). It was also supported by the Conselho Nacional  
318 de Pesquisa (CNPq) (grants 306817/2014-4, 426579/2016-0 and 309560/2017-9) and the Fundação  
319 de Amparo à Pesquisa do Rio de Janeiro FAPERJ (grants E-26/111.655/ 2012, E26/010.002902/2014  
320 and E-26/010.002474/2016; CNE 202.785/2018).

321

## 322 **10 List of abbreviations:**

323 INDC-UFRJ: Institute of Neurology Deolindo Couto of the Federal University of Rio de Janeiro

324 NES: Neuroscience Experiment System

325 TBPI: traumatic brachial plexus injury

326 UAA: Unified Admission Assessment

327 UFA: Unified Follow up Assessment

328 USE: Unified Surgical Evaluation

329

## 330 **11 Acknowledgments**

331 We would like to thank José Fernando Guedes Correa, Paulo Leonardo Tavares, José Vicente  
332 Martins, Abrahão Baptista, Cissa Nunes Soares, Amanda Nascimento, Carlos Ribas, Cassiano R. N.  
333 Santos and Evandro Santos Rocha for their contribution.

334

## 335 **12 References**

336 1. Chicurel M. Databasing the brain. *Nature* (2000) 406:822–825. DOI: 10.1038/35022659

337 2. Koslow SH. Should the neuroscience community make a paradigm shift to sharing primary  
338 data? *Nat. Neurosci.* (2000) 3:863–865. DOI: 10.1038/78760

339 3. Bouchard KE, Aimone JB, Chun M, Dean T, Denker M, Diesmann M, et al. High-

- 340 Performance Computing in Neuroscience for Data-Driven Discovery, Integration, and  
341 Dissemination. *Neuron* (2016) 92:628–631. DOI: 10.1016/j.neuron.2016.10.035
- 342 4. Akil H, Martone ME, Van Essen DC. Challenges and opportunities in mining neuroscience  
343 data. *Science* (2011) 331:708–712. DOI: 10.1126/science.1199305
- 344 5. Russel SM. Examination of Peripheral nerve injuries: an anatomical approach. New York:  
345 Thieme Medical Publishers Inc. (2006). 192 p.
- 346 6. Tung TH, Mackinnon, SE. Brachial plexus injuries. *Clin. Plast. Surg.* (2003) 30:269–287.
- 347 7. Mancuso CA, Lee SK, Dy CJ, Landers ZA, Model Z, Wolfe SW. Expectations and limitations  
348 due to brachial plexus injury: a qualitative study. *Hand* (2015) 10:741–749. DOI:  
349 10.1007/s11552-015-9761-z
- 350 8. Franzblau L, Chung KC. Psychosocial outcomes and coping after complete avulsion traumatic  
351 brachial plexus injury. *Disabil. Rehabil.* (2015) 37:135–143. DOI:  
352 10.3109/09638288.2014.911971
- 353 9. Chuang DCC. Adult Brachial Plexus Reconstruction with the Level of Injury: Review and  
354 Personal Experience. *Plast. Reconstr. Surg.* (2009) 124:e359–e369. DOI:  
355 10.1097/PRS.0b013e3181bcf16c.
- 356 10. Gordon T, English AW. Strategies to promote peripheral nerve regeneration: Electrical  
357 stimulation and/or exercise. *Eur. J. Neurosci.* (2016) 43: 336–350. DOI: 10.1111/ejn.13005
- 358 11. Bengtson KA, Spinner RJ, Bishop AT, Kaufman KR, Coleman-Wood K, Kircher MF, et al.  
359 Measuring Outcomes in Adult Brachial Plexus Reconstruction. *Hand Clin.* (2008) 24:401–  
360 415. DOI: 10.1016/j.hcl.2008.04.001
- 361 12. Dy CJ, Garg R, Lee SK, Tow P, Mancuso CA, Wolfe SW. A systematic review of outcomes  
362 reporting for brachial plexus reconstruction. *J. Hand Surg. Am.* (2015) 40:308–313. DOI:  
363 10.1016/j.jhsa.2014.10.033
- 364 13. Ricardo M. Surgical treatment of brachial plexus injuries in adults. *Int. Orthop.* (2005)  
365 29:351–354. DOI: 10.1007/s00264-005-0017-3
- 366 14. Siqueira MG, Martins RS. Surgical treatment of adult traumatic brachial plexus injuries: An  
367 overview. *Arq. Neuropsiquiatr.* (2011) 69:528–535.
- 368 15. Flores LP. The importance of the preoperative clinical parameters and the intraoperative  
369 electrophysiological monitoring in brachial plexus surgery. *Arq. Neuropsiquiatr.* (2011)  
370 69:654–659
- 371 16. Ali ZS, Heuer GG, Faught RW, Kaneriya SH, Sheikh UA, Syed IS, et al. Upper brachial  
372 plexus injury in adults: comparative effectiveness of different repair techniques. *J Neurosurg.*  
373 (2015) 122:195–201. DOI: 10.3171/2014.9.JNS132823

- 374 17. Narakas AO. The treatment of brachial plexus injuries. *Int. Orthop.* (1985) 9:29–36. DOI:  
375 10.1007/bf00267034
- 376 18. Garg R, Merrell GA, Hillstrom HJ, Wolfe SW. Comparison of nerve transfers and nerve  
377 grafting for traumatic upper plexus palsy: A systematic review and analysis. *J. Bone Joint*  
378 *Surg. Am.* (2011) 93:819–829. DOI: 10.2106/JBJS.I.01602
- 379 19. Merrell GA, Barrie KA, Katz DL, Wolfe SW. Results of nerve transfer techniques for  
380 restoration of shoulder and elbow function in the context of a meta-analysis of the English  
381 literature. *J. Hand Surg. Am.* (2001) 26:303–314. DOI: 10.1053/jhsu.2001.21518
- 382 20. Terzis JK., Verkris MD, Soucacos PN. Outcomes of brachial plexus reconstruction in 204  
383 patients with devastating paralysis. *Plast. Reconstr. Surg.* (1999) 104:1221–1240. DOI:  
384 10.1097/00006534-199910000-00001
- 385 21. Thatte MR, Babhulkar S, Hiremath A. Brachial plexus injury in adults: Diagnosis and surgical  
386 treatment strategies. *Ann Indian Acad Neurol* (2013) 16:26–33. DOI: 10.4103/0972-  
387 2327.107686
- 388 22. Ahmed-Labib M, Golan JD, Jacques L. Functional outcome of brachial plexus reconstruction  
389 after trauma. *Neurosurgery* (2007) 61:1016–1023. DOI:  
390 10.1227/01.neu.0000303197.87672.31
- 391 23. Yang LJS, Chang KWC, Chung KC. A systematic review of nerve transfer and nerve repair  
392 for the treatment of adult upper brachial plexus injury. *Neurosurgery* (2012) 71:417–429. DOI:  
393 10.1227/NEU.0b013e318257be98
- 394 24. Reilly KT, Sirigu A. The Motor Cortex and Its Role in Phantom Limb Phenomena. *Neurosci.*  
395 (2008) 14:195–202. DOI: 10.1177/1073858407309466
- 396 25. Vargas CD, Aballéa A, Rodrigues EC, Reilly KT, Mercier C, Petruzzo P, et al. Re-emergence  
397 of hand-muscle representations in human motor cortex after hand allograft. *Proc. Natl. Acad.*  
398 *Sci. U. S. A.* (2009) 106:7197–202. DOI: 10.1073/pnas.0809614106
- 399 26. Lundborg G. Nerve injury and repair - a challenge to the plastic brain. *J. Peripher. Nerv. Syst.*  
400 (2003) 8:209–226. DOI:10.1111/j.1085-9489.2003.03027.x
- 401 27. Hill BE, Williams G, Bialocerkowski AE. Clinimetric evaluation of questionnaires used to  
402 assess activity after traumatic brachial plexus injury in adults: A systematic review. *Arch.*  
403 *Phys. Med. Rehabil.* (2011) 92:2082–2089. DOI: 10.1016/j.apmr.2011.07.188
- 404 28. Braghetto KR, Nascimento AS. Guidelines for Developing Electronic Questionnaires to  
405 Collect Experimental Data.  
406 [http://neuromat.numec.prp.usp.br/relatorio/artigos/krbraghetto\\_asnascimento\\_artigo\\_neuromat](http://neuromat.numec.prp.usp.br/relatorio/artigos/krbraghetto_asnascimento_artigo_neuromat.pdf)  
407 [.pdf](http://neuromat.numec.prp.usp.br/relatorio/artigos/krbraghetto_asnascimento_artigo_neuromat.pdf) (2014).
- 408 29. Van Eweyk J, Macdonald SC. Guidelines for Working with Small Numbers. Washington State  
409 Department of Health (2012).

- 410 30. Hrynaszkiewicz I, Norton ML, Vickers AJ, Altman DG. Preparing raw clinical data for  
411 publication: guidance for journal editors, authors, and peer reviewers. *BMJ* (2010) 340:1–9.  
412 DOI: 10.1136/bmj.c181
- 413 31. Faglioni W, Siqueira MG, Martins RS, Heise CO, Foroni L. The epidemiology of adult  
414 traumatic brachial plexus lesions in a large metropolis. *Acta Neurochir. (Wien)*. (2014)  
415 156:1025–1028. DOI: 10.1007/s00701-013-1948-x
- 416 32. Mello Junior JS, Souza TCR, Andrade FG, Castaneda L, Baptista AF, Nunes K, et al. Perfil  
417 epidemiológico de pacientes com lesão traumática do plexo braquial avaliados em um hospital  
418 universitário no Rio de Janeiro, Brasil, 2011. TT - Epidemiological profile of patients with  
419 traumatic brachial plexus injury evaluated in a university hos. *Rev. Bras. Neurol.* (2012) 48:7–  
420 11.
- 421 33. Flores LP. Estudo epidemiológico das lesões traumáticas de plexo braquial em adultos. *Arq.*  
422 *Neuropsiquiatr.* (2006) 64:88–94. DOI: /S0004-282X2006000100018
- 423 34. de Moraes FB, Kwae MY, da Silva RP, Porto CC, Magalhães D de P, Paulino MV. Clinical  
424 aspects of patients with traumatic lesions of the brachial plexus following surgical treatment.  
425 *Rev. Bras. Ortop.* (2015) 50:556–561. DOI: 10.1016/j.rboe.2015.08.015
- 426 35. Jain DKA, Bhardwaj P, Venkataramani H, Sabapathy SR. An epidemiological study of  
427 traumatic brachial plexus injury patients treated at an Indian centre. *Indian J. Plast. Surg.*  
428 (2012) 45:498–503. DOI: 10.4103/0970-0358.105960
- 429 36. Moran SL, Steinmann SP, Shin AY. Adult brachial plexus injuries: Mechanism, patterns of  
430 injury, and physical diagnosis. *Hand Clin.* (2005) 21:13–24. DOI: 10.1016/j.hcl.2004.09.004
- 431 37. Ciaramitaro P, Padua L, Devigili G, Rota E, Tamburin S, Eleopra R, et al. Prevalence of  
432 Neuropathic Pain in Patients with Traumatic Brachial Plexus Injury: A Multicenter  
433 Prospective Hospital-Based Study. *Pain Med.* (2017) 18:2428–2432. doi:10.1093/pm/pnw360

434

## 435 **10 Data Availability Statement**

436 The datasets A Public Database on Traumatic Brachial Plexus Injury for this study can be found in  
437 the *Figshare* <https://figshare.com/s/6d11e763c9af85b5c95f>.

438

439

440

441

442

443 Table 1 - LimeSurvey question types and their respective prefix codes.

| <b>Question Type Name</b>      | <b>Description</b>                                        | <b>Code Prefix</b> |
|--------------------------------|-----------------------------------------------------------|--------------------|
| Numeric input                  | Typing integer numbers                                    | Int                |
|                                | Typing decimal numbers                                    | Dec                |
| Free text                      | Typing text                                               | Tex                |
| Long free text                 |                                                           |                    |
| Array of multiple texts        |                                                           |                    |
| Date                           | Typing/selecting date                                     | Dat                |
| List                           | Selecting a single option among many                      | Lst                |
| Array of lists                 | Selecting a single option among many in each list         |                    |
| Multiple choices               | Selecting one or more options among many                  | Mul                |
| Multiple choices with comments |                                                           |                    |
| Equation                       | Value calculated from answers given to previous questions | Equ                |
| Yes or No                      | Answering “yes” or “no”                                   | Yon                |

444

### TBPI Causes

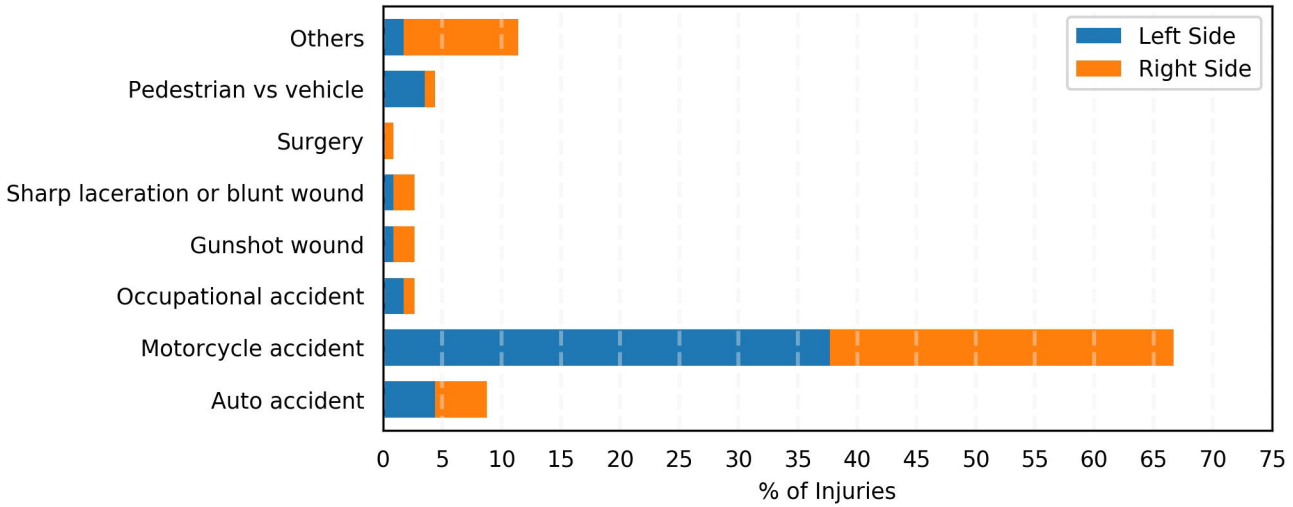

### TBPI Site

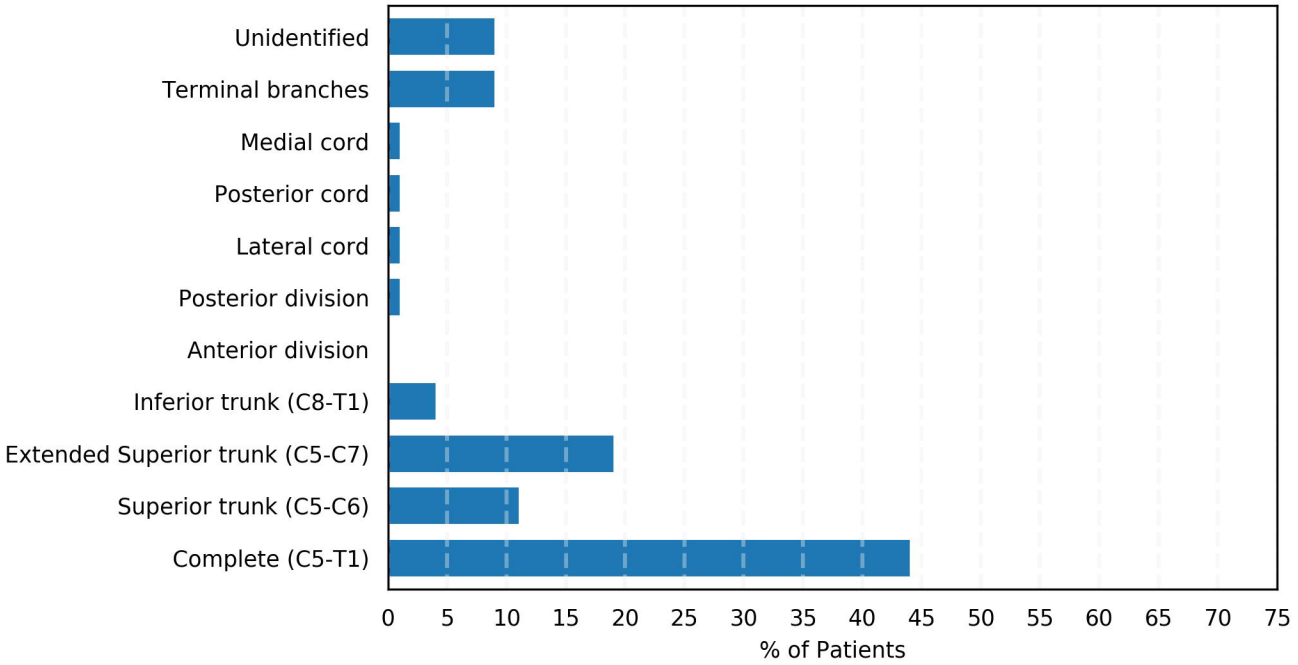

### Injury Features

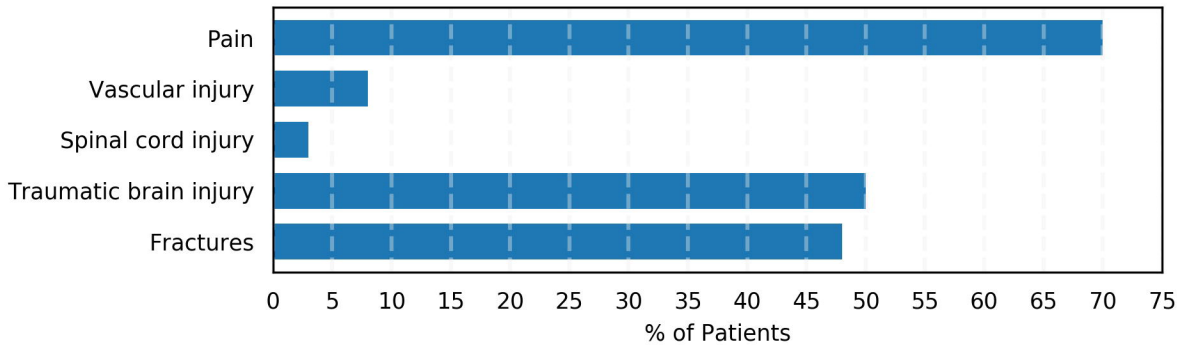

Source: https://www.biorxiv.org/content/10.1101/399824v3.full.pdf
